# Supplementary material
Source: Springer Nature journal article supplement (https://www.springermedizin.de/resource/supplementary/12891_2011_1340_MOESM3_ESM.pdf/9508168)

Age (years)

80  
70  
60  
50  
40  
30  
20  
10  
0

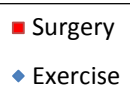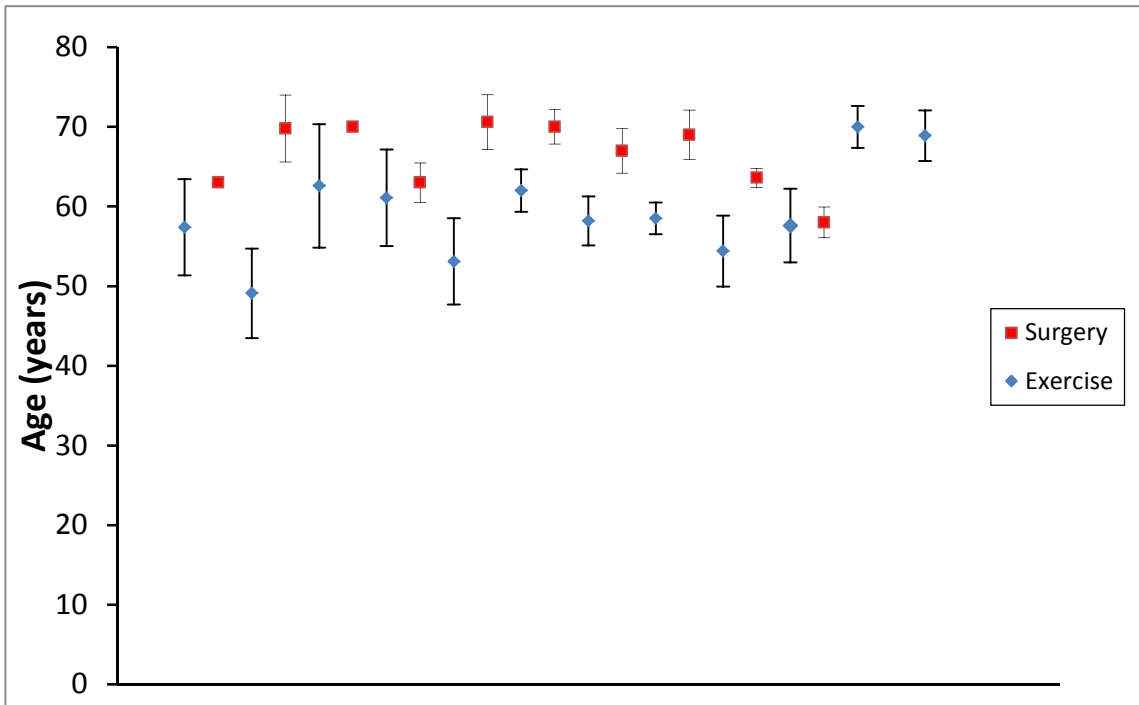

Supplement: MOESM3 [file 9508168]
